# Supplementary material
Source: PubMed Central journal article supplement (PMC7725281)
Supplement: NIHMS1590284-supplement-2.pdf [file NIHMS1590284-supplement-2.pdf]

## Structure of human GABA<sub>B</sub> receptor in an inactive state

Jinseo Park<sup>1,19</sup>, Ziao Fu<sup>2,19</sup>, Aurel Frangaj<sup>1,19</sup>, Jonathan Liu<sup>1,19</sup>, Lidia Mosyak<sup>1,19</sup>, Tong Shen<sup>3,19</sup>, Vesna N. Slavkovich<sup>4</sup>, Kimberly M. Ray<sup>1</sup>, Jaume Taura<sup>5</sup>, Baohua Cao<sup>1</sup>, Yong Geng<sup>1,6</sup>, Hao Zuo<sup>1</sup>, Yongjun Kou<sup>6</sup>, Robert Grassucci<sup>2</sup>, Shaoxia Chen<sup>7</sup>, Zheng Liu<sup>2</sup>, Xin Lin<sup>8,14</sup>, Justin P. Williams<sup>9</sup>, William J. Rice<sup>10</sup>, Edward T. Eng<sup>10</sup>, Rick K. Huang<sup>11</sup>, Rajesh K. Soni<sup>12</sup>, Brian Kloss<sup>13</sup>, Zhiheng Yu<sup>11</sup>, Jonathan A. Javitch<sup>1,8,9,14</sup>, Wayne A. Hendrickson<sup>2,9,13</sup>, Paul A. Slesinger<sup>5</sup>, Matthias Quick<sup>8,14</sup>, Joseph Graziano<sup>4</sup>, Hongtao Yu<sup>15</sup>, Oliver Fiehn<sup>3</sup>, Oliver B. Clarke<sup>9,16,\*</sup>, Joachim Frank<sup>2,17,\*</sup>, Qing R. Fan<sup>1,18,\*</sup>

<sup>1</sup>Department of Pharmacology, Columbia University, New York, NY, USA.

<sup>2</sup>Department of Biochemistry and Molecular Biophysics, Columbia University, New York, NY, USA.

<sup>3</sup>NIH West Coast Metabolomics Center, University of California Davis, CA, USA.

<sup>4</sup>Department of Environmental Health Sciences, Columbia University, New York, NY, USA.

<sup>5</sup>Nash Family Department of Neuroscience, Friedman Brain Institute, Icahn School of Medicine at Mount Sinai, New York, New York, USA.

<sup>6</sup>Key Laboratory of Receptor Research, Center for Structure and Function of Drug Targets, Shanghai Institute of Materia Medica, Chinese Academy of Sciences, Shanghai, China.

<sup>7</sup>MRC Laboratory of Molecular Biology, Cambridge, UK.

<sup>8</sup>Department of Psychiatry, Columbia University, New York, NY, USA.

<sup>9</sup>Department of Physiology and Cellular Biophysics, Columbia University, New York, NY, USA.

<sup>10</sup>National Resource for Automated Molecular Microscopy, Simons Electron Microscopy Center, New York Structural Biology Center, New York, NY, USA.

<sup>11</sup>Janelia Research Campus, Howard Hughes Medical Institute, Ashburn, VA, USA.

<sup>12</sup>Proteomics Shared Resource, Herbert Irving Comprehensive Cancer Center, Columbia University, New York, NY, USA.

<sup>13</sup>Center on Membrane Protein Production and Analysis, New York Structural Biology Center, New York, NY, USA.

<sup>14</sup>Division of Molecular Therapeutics, New York State Psychiatric Institute, New York, NY, USA.

<sup>15</sup>Howard Hughes Medical Institute, Department of Pharmacology, University of Texas Southwestern Medical Center, Dallas, TX, USA.

<sup>16</sup>Department of Anesthesiology and the Irving Institute for Clinical and Translational Research, Columbia University, New York, NY, USA.

<sup>17</sup>Department of Biological Sciences, Columbia University, New York, NY, USA.

<sup>18</sup>Department of Pathology and Cell Biology, Columbia University, New York, NY, USA.

<sup>19</sup>These authors contributed equally to this work.

\*email: [oc2188@cumc.columbia.edu](mailto:oc2188@cumc.columbia.edu) (O.B.C.); [jf2192@cumc.columbia.edu](mailto:jf2192@cumc.columbia.edu) (J.F.); [qf13@cumc.columbia.edu](mailto:qf13@cumc.columbia.edu) (Q.R.F.).

a

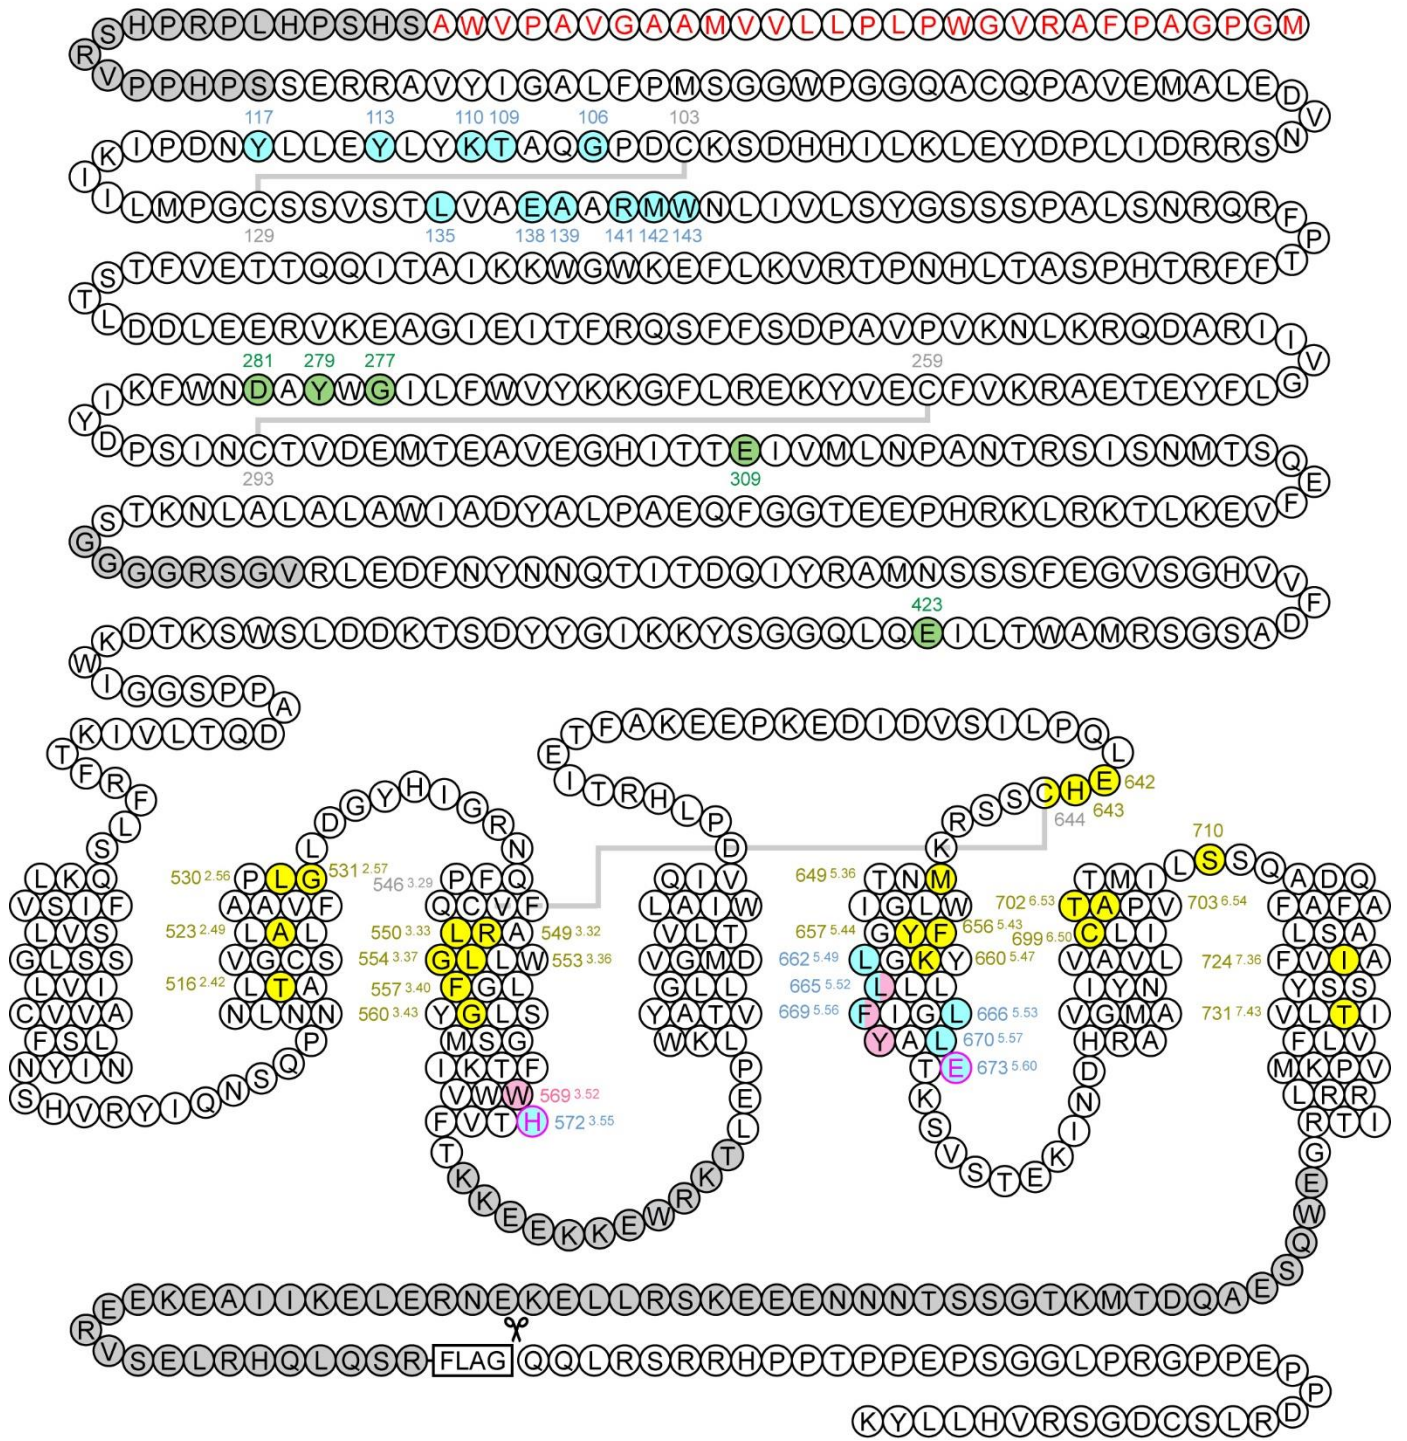

b

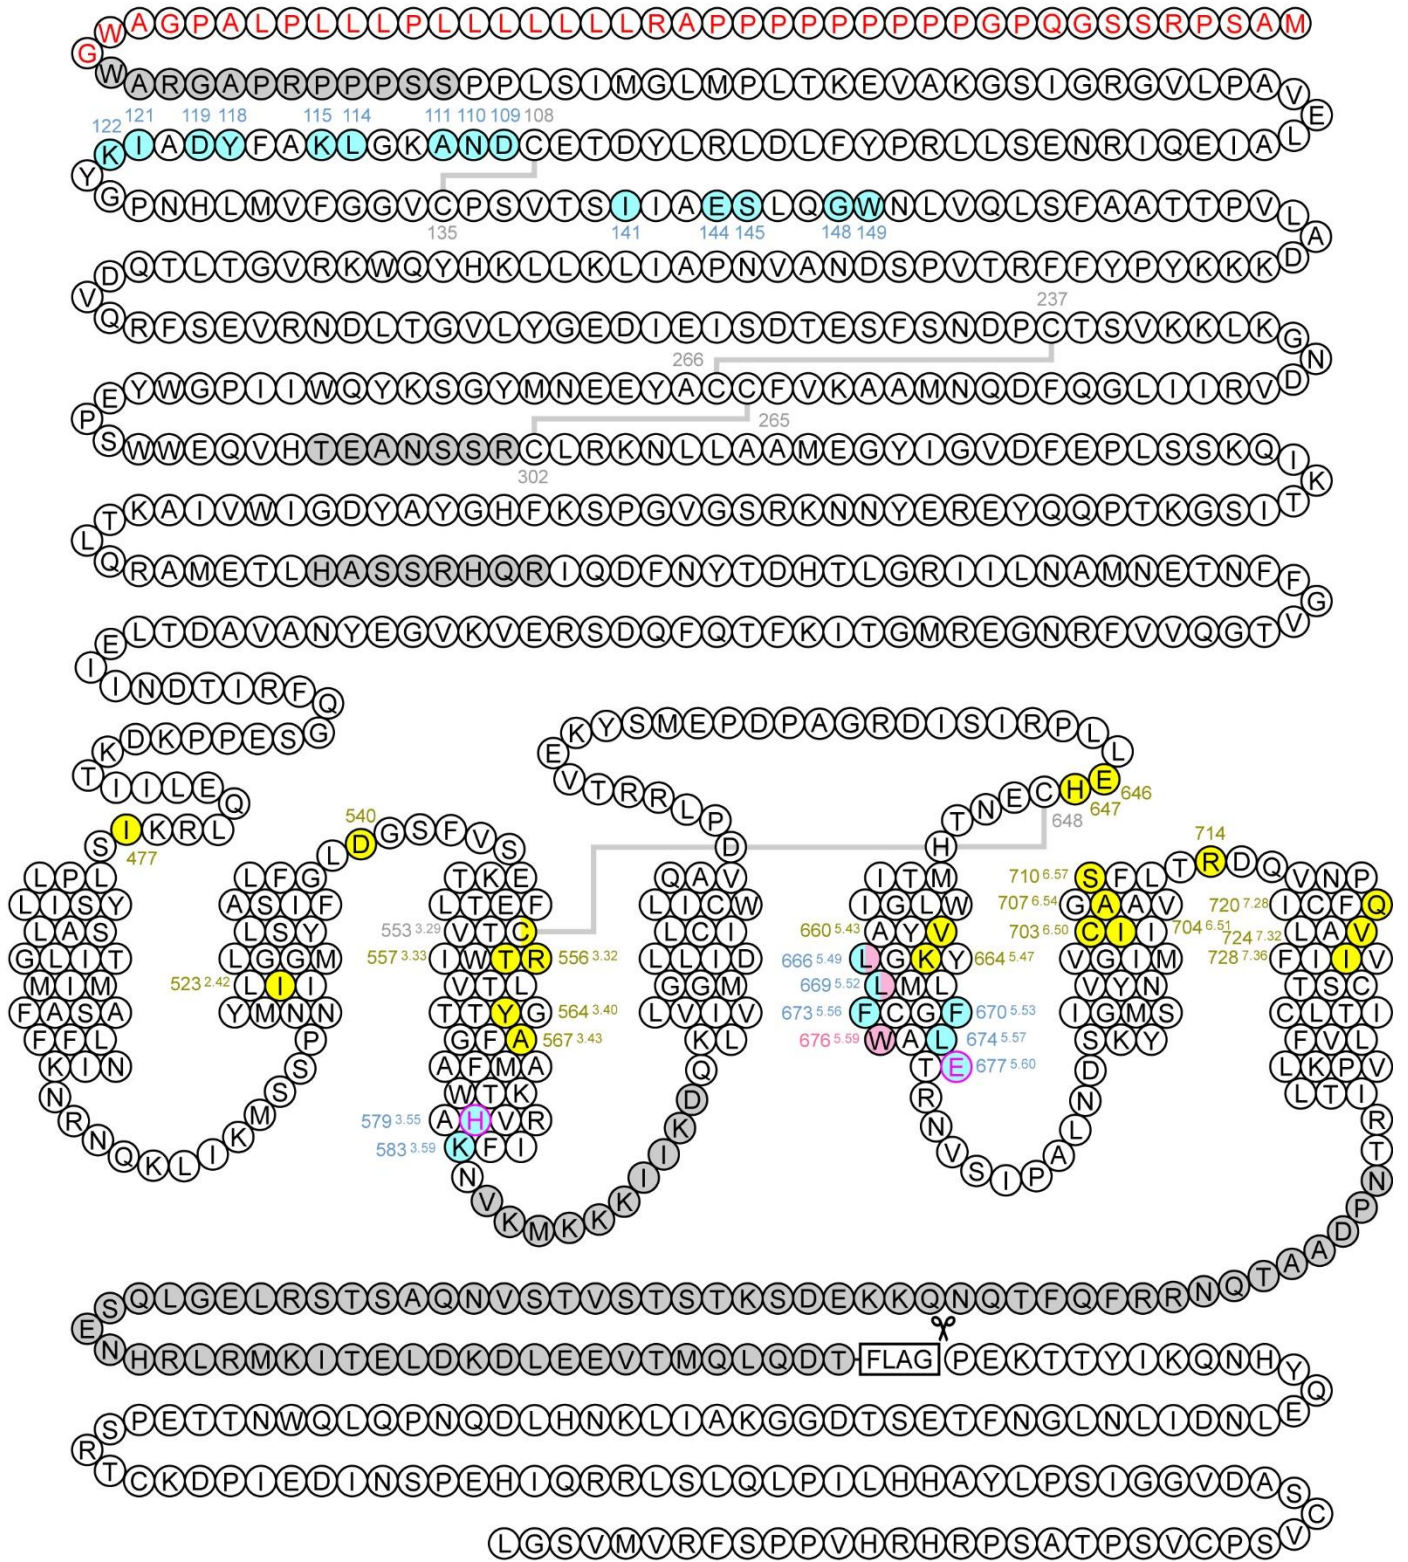

**Supplementary Fig. 1 | Schematic diagram of GABA<sub>B</sub> receptor subunits.**

**a,b**, Protein sequences of human GABA<sub>B1b</sub> (**a**) and GABA<sub>B2</sub> (**b**) depicting key residues in each subunit. The signal peptide of each subunit is in red lettering. The expression construct terminates with a Flag tag, and the remaining residues that are excluded appear after black scissors. Disordered residues in the structure are shaded gray. Disulfide-bonded cysteines are partnered through a gray-colored bold line. Cyan residues form direct contacts at the heterodimeric interface between GABA<sub>B1b</sub> and GABA<sub>B2</sub> subunits, while pink residues mediate heterodimer interaction through a cholesterol molecule. Cyan residues with pink lettering and outlines form the 'intersubunit latch' with each other (GABA<sub>B1b</sub>: His572<sup>3,55</sup> and Glu673<sup>5,60</sup>; GABA<sub>B2</sub>: His579<sup>3,55</sup> and Glu677<sup>5,60</sup>). Yellow residues interact with the phospholipid (GABA<sub>B1b</sub>, PE 38:5; GABA<sub>B2</sub>, PC 38:2) within the TM pocket. In the GABA<sub>B1b</sub> subunit, residues that sequester Ca<sup>2+</sup> are green.

Extended Data Fig.1b

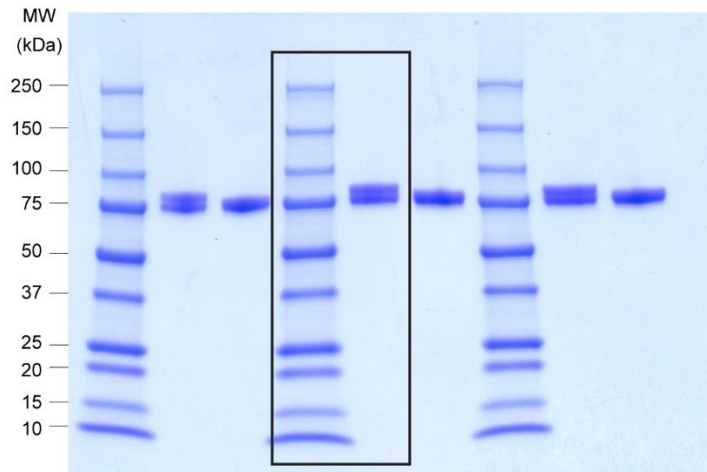

**Supplementary Fig. 2 | Gel source data for Extended Data Fig. 1b.**

The content of Extended Data Fig. 1b is highlighted in a box. The experiment was repeated three times with similar results.

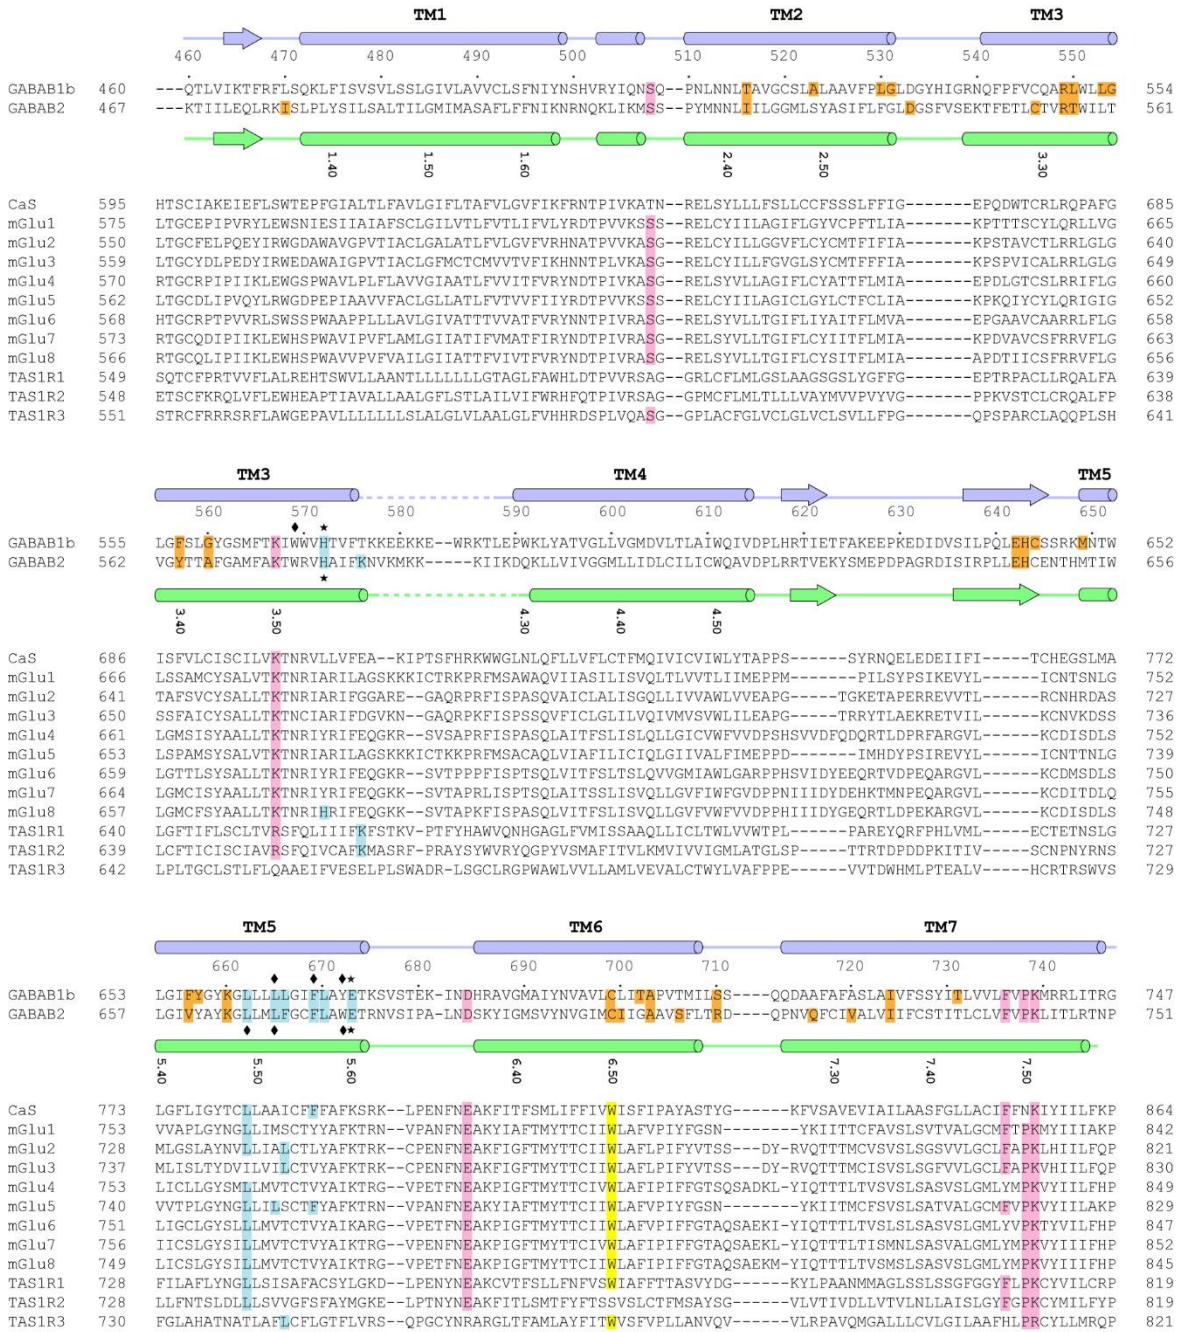

### Supplementary Fig. 3 | Sequence alignment of human class C GPCRs.

The alignment covers the linker and TM domain of GABA<sub>B</sub> receptor and corresponding regions in other class C GPCRs. Secondary structure elements are displayed for GABA<sub>B1b</sub> (blue) and GABA<sub>B2</sub> (green) subunits;  $\beta$ -strands are represented by arrows and  $\alpha$ -helices by cylinders. Disordered regions are denoted by dashed lines. Alignment of TM helices is based on a modified Ballesteros-Weinstein numbering system for class C receptors, with TM positions marked for every ten residues around X.50 (X refers to TM helix number)<sup>59,60</sup>. GABA<sub>B</sub> residues involved in phospholipid binding are highlighted in orange. Contacting residues at the heterodimer interface between GABA<sub>B1b</sub> and GABA<sub>B2</sub> subunits are highlighted in cyan; diamonds indicate residues that mediate heterodimeric interaction through cholesterol; stars mark residues that form the 'intersubunit latch' (GABA<sub>B1b</sub>: His572<sup>3,55</sup> and Glu673<sup>5,60</sup>; GABA<sub>B2</sub>: His579<sup>3,55</sup> and Glu677<sup>5,60</sup>). For all receptors, heterodimer interface residues of GABA<sub>B</sub> that are conserved in other class C receptors are also in cyan, similarly charged or wholly conserved residues that correspond to the intramolecular 'ionic lock' and FxPKxx motifs of GABA<sub>B</sub> receptor are in pink, conserved tryptophan of the toggle motif is in yellow.

## Supplementary Table 1 | Cryo-EM data collection, refinement and validation statistics

|                                                     | Human GABA <sub>B</sub> receptor<br>(EMD-21685)<br>(PDB 6WIV) |
|-----------------------------------------------------|---------------------------------------------------------------|
| <b>Data collection and processing</b>               |                                                               |
| Magnification                                       | 130,000 x                                                     |
| Voltage (kV)                                        | 300                                                           |
| Electron exposure (e <sup>-</sup> /Å <sup>2</sup> ) | 85                                                            |
| Defocus range (µm)                                  | -0.5 to -2                                                    |
| Pixel size (Å)                                      | 1.06                                                          |
| Symmetry imposed                                    | C1                                                            |
| Initial particle images (no.)                       | 1,048,241                                                     |
| Final particle images (no.)                         | 233,737                                                       |
| Map resolution (Å)                                  | 3.1 (ECD); 3.4 (TM); 3.3 (Global)                             |
| FSC threshold                                       | 0.143                                                         |
| Map resolution range <sup>1</sup> (Å)               | 2.8-7.3 (ECD); 2.9-9.3 (TM); 3.0-6.4 (Global)                 |
| <b>Refinement</b>                                   |                                                               |
| Initial model used (PDB code)                       | 4MQE                                                          |
| Model resolution (Å)                                | 3.3                                                           |
| FSC threshold                                       | 0.5                                                           |
| Model resolution range <sup>2</sup> (Å)             | 3.0-6.0                                                       |
| Map sharpening <i>B</i> factor (Å <sup>2</sup> )    | -75.0 (ECD); -79.0 (TM); -91.2 (Global)                       |
| Model composition                                   |                                                               |
| Non-hydrogen atoms                                  | 11,213                                                        |
| Protein residues                                    | 1,352                                                         |
| Ligands - Ca <sup>2+</sup>                          | 1                                                             |
| Sugar                                               | 4                                                             |
| Cholesterol                                         | 10                                                            |
| Phospholipid                                        | 2                                                             |
| <i>B</i> factors (Å <sup>2</sup> )                  |                                                               |
| Protein                                             | 69.0                                                          |
| Ligands - Ca <sup>2+</sup>                          | 71.6                                                          |
| Sugar                                               | 89.8                                                          |
| Cholesterol                                         | 67.0                                                          |
| Phospholipid                                        | 61.2                                                          |
| R.m.s. deviations                                   |                                                               |
| Bond lengths (Å)                                    | 0.005                                                         |
| Bond angles (°)                                     | 0.71                                                          |
| Validation                                          |                                                               |
| MolProbity score                                    | 1.49                                                          |
| Clashscore                                          | 5.49                                                          |
| Poor rotamers (%)                                   | 0.08                                                          |
| Ramachandran plot                                   |                                                               |
| Favored (%)                                         | 96.9                                                          |
| Allowed (%)                                         | 3.1                                                           |
| Disallowed (%)                                      | 0.0                                                           |

<sup>1</sup>Total range of local resolution values within the mask used to calculate FSC.

<sup>2</sup>Range of local resolution values at atom positions, averaged per residue.

**Supplementary Table 2 | Transmembrane helices in GABA<sub>B</sub> receptor subunits**

| TM1  |      | TM2  |      | TM3  |      | TM4  |      | TM5  |      | TM6  |      | TM7  |      |      |      |      |      |      |      |      |
|------|------|------|------|------|------|------|------|------|------|------|------|------|------|------|------|------|------|------|------|------|
| B1b  | B2   |      |      |      |      |      |      |      |
| 1.37 | Q472 | L479 | 2.36 | P510 | P517 | 3.22 | -    | E546 | 4.29 | P590 | -    | 5.36 | M649 | M653 | 6.36 | H685 | S689 | 7.25 | Q713 | P717 |
| 1.38 | K473 | P480 | 2.37 | N511 | Y518 | 3.23 | -    | K547 | 4.30 | W591 | -    | 5.37 | N650 | T654 | 6.37 | R686 | K690 | 7.26 | D714 | N718 |
| 1.39 | L474 | L481 | 2.38 | L512 | M519 | 3.24 | Q541 | T548 | 4.31 | K592 | K596 | 5.38 | T651 | I655 | 6.38 | A687 | Y691 | 7.27 | A715 | V719 |
| 1.40 | F475 | Y482 | 2.39 | N513 | N520 | 3.25 | F542 | F549 | 4.32 | L593 | L597 | 5.39 | W652 | W656 | 6.39 | V688 | I692 | 7.28 | A716 | Q720 |
| 1.41 | I476 | S483 | 2.40 | N514 | N521 | 3.26 | P543 | E550 | 4.33 | Y594 | L598 | 5.40 | L653 | L657 | 6.40 | G689 | G693 | 7.29 | F717 | F721 |
| 1.42 | S477 | T484 | 2.41 | L515 | L522 | 3.27 | F544 | T551 | 4.34 | A595 | V599 | 5.41 | G654 | G658 | 6.41 | M690 | M694 | 7.30 | A718 | C722 |
| 1.43 | V478 | L485 | 2.42 | T516 | I523 | 3.28 | V545 | L552 | 4.35 | T596 | I600 | 5.42 | I655 | I659 | 6.42 | A691 | S695 | 7.31 | F719 | I723 |
| 1.44 | S479 | S486 | 2.43 | A517 | I524 | 3.29 | C546 | C553 | 4.36 | V597 | V601 | 5.43 | F656 | V660 | 6.43 | I692 | V696 | 7.32 | A720 | V724 |
| 1.45 | V480 | A487 | 2.44 | V518 | L525 | 3.30 | Q547 | T554 | 4.37 | G598 | G602 | 5.44 | Y657 | Y661 | 6.44 | Y693 | Y697 | 7.33 | S721 | A725 |
| 1.46 | L481 | L488 | 2.45 | G519 | G526 | 3.31 | A548 | V555 | 4.38 | L599 | G603 | 5.45 | G658 | A662 | 6.45 | N694 | N698 | 7.34 | L722 | L726 |
| 1.47 | S482 | T489 | 2.46 | C520 | G527 | 3.32 | R549 | R556 | 4.39 | L600 | M604 | 5.46 | Y659 | Y663 | 6.46 | V695 | V699 | 7.35 | A723 | V727 |
| 1.48 | S483 | I490 | 2.47 | S521 | M528 | 3.33 | L550 | T557 | 4.40 | V601 | L605 | 5.47 | K660 | K664 | 6.47 | A696 | G700 | 7.36 | I724 | I728 |
| 1.49 | L484 | L491 | 2.48 | L522 | L529 | 3.34 | W551 | W558 | 4.41 | G602 | L606 | 5.48 | G661 | G665 | 6.48 | V697 | I701 | 7.37 | V725 | I729 |
| 1.50 | G485 | G492 | 2.49 | A523 | S530 | 3.35 | L552 | I559 | 4.42 | M603 | I607 | 5.49 | L662 | L666 | 6.49 | L698 | M702 | 7.38 | F726 | F730 |
| 1.51 | I486 | M493 | 2.50 | L524 | Y531 | 3.36 | L553 | L560 | 4.43 | D604 | D608 | 5.50 | L663 | L667 | 6.50 | C699 | C703 | 7.39 | S727 | C731 |
| 1.52 | V487 | I494 | 2.51 | A525 | A532 | 3.37 | G554 | T561 | 4.44 | V605 | I609 | 5.51 | L664 | M668 | 6.51 | L700 | I704 | 7.40 | S728 | S732 |
| 1.53 | L488 | M495 | 2.52 | A526 | S533 | 3.38 | L555 | V562 | 4.45 | L606 | C610 | 5.52 | L665 | I669 | 6.52 | I701 | I705 | 7.41 | Y729 | T733 |
| 1.54 | A489 | A496 | 2.53 | V527 | I534 | 3.39 | G556 | G563 | 4.46 | T607 | I611 | 5.53 | L666 | F670 | 6.53 | T702 | G706 | 7.42 | I730 | I734 |
| 1.55 | V490 | S497 | 2.54 | F528 | F535 | 3.40 | F557 | Y564 | 4.47 | L608 | L612 | 5.54 | G667 | G671 | 6.54 | A703 | A707 | 7.43 | T731 | T735 |
| 1.56 | V491 | A498 | 2.55 | P529 | L536 | 3.41 | S558 | T565 | 4.48 | A609 | I613 | 5.55 | I668 | C672 | 6.55 | P704 | A708 | 7.44 | L732 | L736 |
| 1.57 | C492 | F499 | 2.56 | L530 | F537 | 3.42 | L559 | T566 | 4.49 | I610 | C614 | 5.56 | F669 | F673 | 6.56 | V705 | V709 | 7.45 | V733 | C737 |
| 1.58 | L493 | L500 | 2.57 | G531 | G538 | 3.43 | G560 | A567 | 4.50 | W611 | W615 | 5.57 | L670 | L674 | 6.57 | T706 | S710 | 7.46 | V734 | L738 |
| 1.59 | S494 | F501 |      |      |      | 3.44 | Y561 | F568 | 4.51 | Q612 | Q616 | 5.58 | A671 | A675 | 6.58 | M707 | F711 | 7.47 | L735 | V739 |
| 1.60 | F495 | F502 |      |      |      | 3.45 | G562 | G569 | 4.52 | I613 | A617 | 5.59 | Y672 | W676 | 6.59 | I708 | L712 | 7.48 | F736 | F740 |
| 1.61 | N496 | N503 |      |      |      | 3.46 | S563 | A570 | 4.53 | V614 | V618 | 5.60 | E673 | E677 |      |      |      | 7.49 | V737 | V741 |
| 1.62 | I497 | I504 |      |      |      | 3.47 | M564 | M571 |      |      |      | 5.61 | T674 | T678 |      |      |      | 7.50 | P738 | P742 |
| 1.63 | Y498 | K505 |      |      |      | 3.48 | F565 | F572 |      |      |      |      |      |      |      |      |      | 7.51 | K739 | K743 |
| 1.64 | N499 | -    |      |      |      | 3.49 | T566 | A573 |      |      |      |      |      |      |      |      |      | 7.52 | M740 | L744 |
|      |      |      |      |      |      | 3.50 | K567 | K574 |      |      |      |      |      |      |      |      |      | 7.53 | R741 | I745 |
|      |      |      |      |      |      | 3.51 | I568 | T575 |      |      |      |      |      |      |      |      |      | 7.54 | R742 | T746 |
|      |      |      |      |      |      | 3.52 | W569 | W576 |      |      |      |      |      |      |      |      |      | 7.55 | L743 | L747 |
|      |      |      |      |      |      | 3.53 | W570 | R577 |      |      |      |      |      |      |      |      |      | 7.56 | I744 | R748 |
|      |      |      |      |      |      | 3.54 | V571 | V578 |      |      |      |      |      |      |      |      |      | 7.57 | T745 | -    |
|      |      |      |      |      |      | 3.55 | H572 | H579 |      |      |      |      |      |      |      |      |      | 7.58 | R746 | -    |
|      |      |      |      |      |      | 3.56 | T573 | A580 |      |      |      |      |      |      |      |      |      |      |      |      |
|      |      |      |      |      |      | 3.57 | V574 | I581 |      |      |      |      |      |      |      |      |      |      |      |      |
|      |      |      |      |      |      | 3.58 | F575 | F582 |      |      |      |      |      |      |      |      |      |      |      |      |
|      |      |      |      |      |      | 3.59 | -    | K583 |      |      |      |      |      |      |      |      |      |      |      |      |

Numbering of TM helix residues is based on a modified Ballesteros-Weinstein system for class C receptors (59, 60).



**Supplementary Table 3 | Elemental analysis of GABA<sub>B</sub> receptor**

|                                                                      |                   | <b>Mg</b> | <b>Ca</b> | <b>Mn</b> | <b>Fe</b> | <b>Co</b> | <b>Ni</b> | <b>Cu</b> | <b>Zn</b> | <b>Sr</b> |
|----------------------------------------------------------------------|-------------------|-----------|-----------|-----------|-----------|-----------|-----------|-----------|-----------|-----------|
| <b>Buffer [M<sub>B</sub>]<sup>1</sup></b>                            | μg/L              | 0.09      | 9.19      | 0.00      | 0.00      | 0.00      | 0.00      | 0.02      | 0.07      | 0.04      |
|                                                                      | C.V. <sup>2</sup> | 4.7%      | 3.5%      | 20.5%     | 19.3%     | 43.7%     | 98.2%     | 10.6%     | 4.7%      | 1.9%      |
| <b>Protein<sup>3</sup> [M<sub>P</sub>]<sup>1</sup></b>               | μg/L              | 0.41      | 28.91     | 0.01      | 3.79      | 0.20      | 8.23      | 36.95     | 1.80      | 0.17      |
|                                                                      | C.V. <sup>2</sup> | 2.7%      | 2.0%      | 3.9%      | 1.1%      | 2.5%      | 2.2%      | 2.1%      | 1.4%      | 1.5%      |
| <b>Net [M]<sup>1</sup><br/>( [M<sub>B</sub>] - [M<sub>B</sub>] )</b> | μg/L              | 0.32      | 19.72     | 0.01      | 3.79      | 0.20      | 8.23      | 36.93     | 1.73      | 0.13      |
|                                                                      | μM                | 0.01      | 0.49      | 0.00      | 0.07      | 0.00      | 0.14      | 0.58      | 0.03      | 0.00      |
| <b>Ratio<sup>4</sup><br/>Net [M] / [P]</b>                           |                   | 0.01      | 0.43      | 0.00      | 0.06      | 0.00      | 0.12      | 0.51      | 0.02      | 0.00      |

<sup>1</sup>[M<sub>B</sub>] is metal concentration in buffer; [M<sub>P</sub>] is metal concentration in GABA<sub>B</sub> receptor protein sample; Net [M] is the metal concentration in protein sample after buffer correction.

<sup>2</sup>C.V. is coefficient of variance

<sup>3</sup>Protein concentration in GABA<sub>B</sub> receptor sample [P] is 1.15 μM.

<sup>4</sup>Molar ratio of net metal concentration to protein concentration.

Data represents average of eight measurements within two experiments.

## Supplementary references

- 59 Ballesteros, J. A. & Weinstein, H. Integrated Methods for the Construction of Three-Dimensional Models and Computational Probing of Structure-Function Relations in G Protein-Coupled Receptors *Methods in Neuroscience* **25**, 366-428, (1995).
- 60 Pin, J. P., Galvez, T. & Prezeau, L. Evolution, structure, and activation mechanism of family 3/C G-protein-coupled receptors. *Pharmacol. Ther.* **98**, 325-354, (2003).
